# Supplementary material for: Value of a combined magnetic resonance imaging-based radiomics-clinical model for predicting extracapsular extension in prostate cancer: a preliminary study
Source: PubMed Central journal article supplement — Transl Cancer Res. 2023 Jun 26;12(7):1787–801. doi: 10.21037/tcr-22-2750 (PMC10425641; doi:10.21037/tcr-22-2750), 2023-06-26
Supplement: tcr-12-07-1787-dss.pdf [file tcr-12-07-1787-dss.pdf]

## Data Sharing Statement

|                     |                                                                                                                                                     |                                                                                                                                                                                                                                                                                                                                                |
|---------------------|-----------------------------------------------------------------------------------------------------------------------------------------------------|------------------------------------------------------------------------------------------------------------------------------------------------------------------------------------------------------------------------------------------------------------------------------------------------------------------------------------------------|
| <b>Article Info</b> | <a href="https://dx.doi.org/10.21037/tcr-22-2750">https://dx.doi.org/10.21037/tcr-22-2750</a>                                                       |                                                                                                                                                                                                                                                                                                                                                |
| <b>Item</b>         | <b>Question</b>                                                                                                                                     | <b>Authors' Response<br/>(place "-" if not applicable)</b>                                                                                                                                                                                                                                                                                     |
| 1                   | Would you like to share data collected for your study to others?                                                                                    | No.                                                                                                                                                                                                                                                                                                                                            |
| 2                   | If not, would you like to share the reason for your decision?                                                                                       | The imaging studies and clinical data used for algorithm development are not publicly available, because they contain private patient health information. Interested users may request access to these data, where institutional approvals along with signed data use agreements and/or material transfer agreements may be needed/negotiated. |
| 3                   | What data in particular will be shared?                                                                                                             | -                                                                                                                                                                                                                                                                                                                                              |
| 4                   | Any other documents will be shared? Such as study protocol, statistical analysis plan, informed consent form, clinical study report, analytic code. | Statistical analysis plan and clinical study report will also be shared if requested.                                                                                                                                                                                                                                                          |
| 5                   | When will data availability begin?                                                                                                                  | -                                                                                                                                                                                                                                                                                                                                              |
| 6                   | When will data availability end?                                                                                                                    | -                                                                                                                                                                                                                                                                                                                                              |
| 7                   | To whom will you share the data?                                                                                                                    | -                                                                                                                                                                                                                                                                                                                                              |
| 8                   | For what type of analysis or purpose?                                                                                                               | -                                                                                                                                                                                                                                                                                                                                              |
| 9                   | How or where can the data/documents be obtained?                                                                                                    | Emails could be sent to the address below to obtain the shared data:<br>wangximing1998@163.com.                                                                                                                                                                                                                                                |
| 10                  | Any other restrictions?                                                                                                                             | We may balance the potential benefits and risks for each request and then provide the data that could be shared.                                                                                                                                                                                                                               |
